# Supplementary material for: Anti-choline esterase activity of ceramides from the Red Sea marine sponge Mycale euplectellioides
Source: Royal Society of Chemistry journal article supplement (doi:10.1039/c5ra26424c), 2016-01-01
Supplement: c5ra26424c1.pdf [file c5ra26424c1.pdf]

## Anti-choline esterase activity of ceramides from the Red Sea Marine Sponge *Mycale euplectellioides*

**Reda Abdelhameed,<sup>a,b</sup> Mohamed Saleh Elgawish,<sup>c</sup> Amira Mira,<sup>d</sup> Amany K. Ibrahim,<sup>b</sup> Safwat A. Ahmed,<sup>b</sup> Kuniyoshi Shimizu,<sup>e</sup> Koji Yamada,<sup>\*a</sup>**

<sup>a</sup> Graduate School of Biomedical Sciences, Nagasaki University, 1-14 Bunkyo-machi, Nagasaki 852-8521, Japan

<sup>b</sup> Pharmacognosy Department, Faculty of Pharmacy, Suez Canal University, Ismailia 41522, Egypt

<sup>c</sup> Medicinal Chemistry Department, Faculty of Pharmacy, Suez Canal University, Ismailia 41522, Egypt

<sup>d</sup> Pharmacognosy Department, Faculty of Pharmacy, Mansoura University, Mansoura 35516, Egypt

<sup>e</sup> Division of Systematic Forest and Forest Products Sciences, Department of agroenvironmental sciences, Faculty of Agriculture, Graduate School of Kyushu University, Fukuoka 812-8581, Japan

\*corresponding author

Email: [kyamada@nagasaki-u.ac.jp](mailto:kyamada@nagasaki-u.ac.jp)

Tel: +81-95-819-2462

Fax: +81-95-819-2462

## Table of Contents

|                                                                                                                     |    |
|---------------------------------------------------------------------------------------------------------------------|----|
| <b>Figure S1:</b> $^1\text{H}$ -NMR spectrum of MEC-1 (400 MHz, $\text{C}_5\text{D}_5\text{N}$ ).....               | 3  |
| <b>Figure S2:</b> $^{13}\text{C}$ -NMR spectra of MEC-1 (400 MHz, $\text{C}_5\text{D}_5\text{N}$ ).....             | 4  |
| <b>Figure S3:</b> FAB-MS (positive ion mode) of MEC-1.....                                                          | 5  |
| <b>Figure S4:</b> $^1\text{H}$ -NMR spectrum of FAMES after hydrolysis of MEC-1 (400 MHz, $\text{CDCl}_3$ ).....    | 6  |
| <b>Figure S5:</b> $^{13}\text{C}$ -NMR spectrum of FAMES after hydrolysis of MEC-1 (400 MHz, $\text{CDCl}_3$ )..... | 7  |
| <b>Figure S6:</b> EI-MS of FAMES after hydrolysis of MEC-1.....                                                     | 8  |
| <b>Figure S7:</b> $^1\text{H}$ -NMR spectrum of LCB after hydrolysis of MEC-1 (400 MHz, MeOD).....                  | 9  |
| <b>Figure S8:</b> $^{13}\text{C}$ -NMR spectrum of LCB after hydrolysis of MEC-1 (400 MHz, MeOD).....               | 10 |
| <b>Figure S9:</b> FAB-MS (positive ion mode) of LCB after hydrolysis of MEC-1.....                                  | 11 |
| <b>Figure S10:</b> Analytical HPLC chromatogram of MEC-1.....                                                       | 12 |
| <b>Figure S11:</b> FAB-MS (positive ion mode) of MEC-1-4.....                                                       | 13 |
| <b>Figure S12:</b> FAB-MS (positive ion mode) of MEC-1-7.....                                                       | 14 |
| <b>Figure S13:</b> FAB-MS (positive ion mode) of MEC-1-8.....                                                       | 15 |

# MEC-1

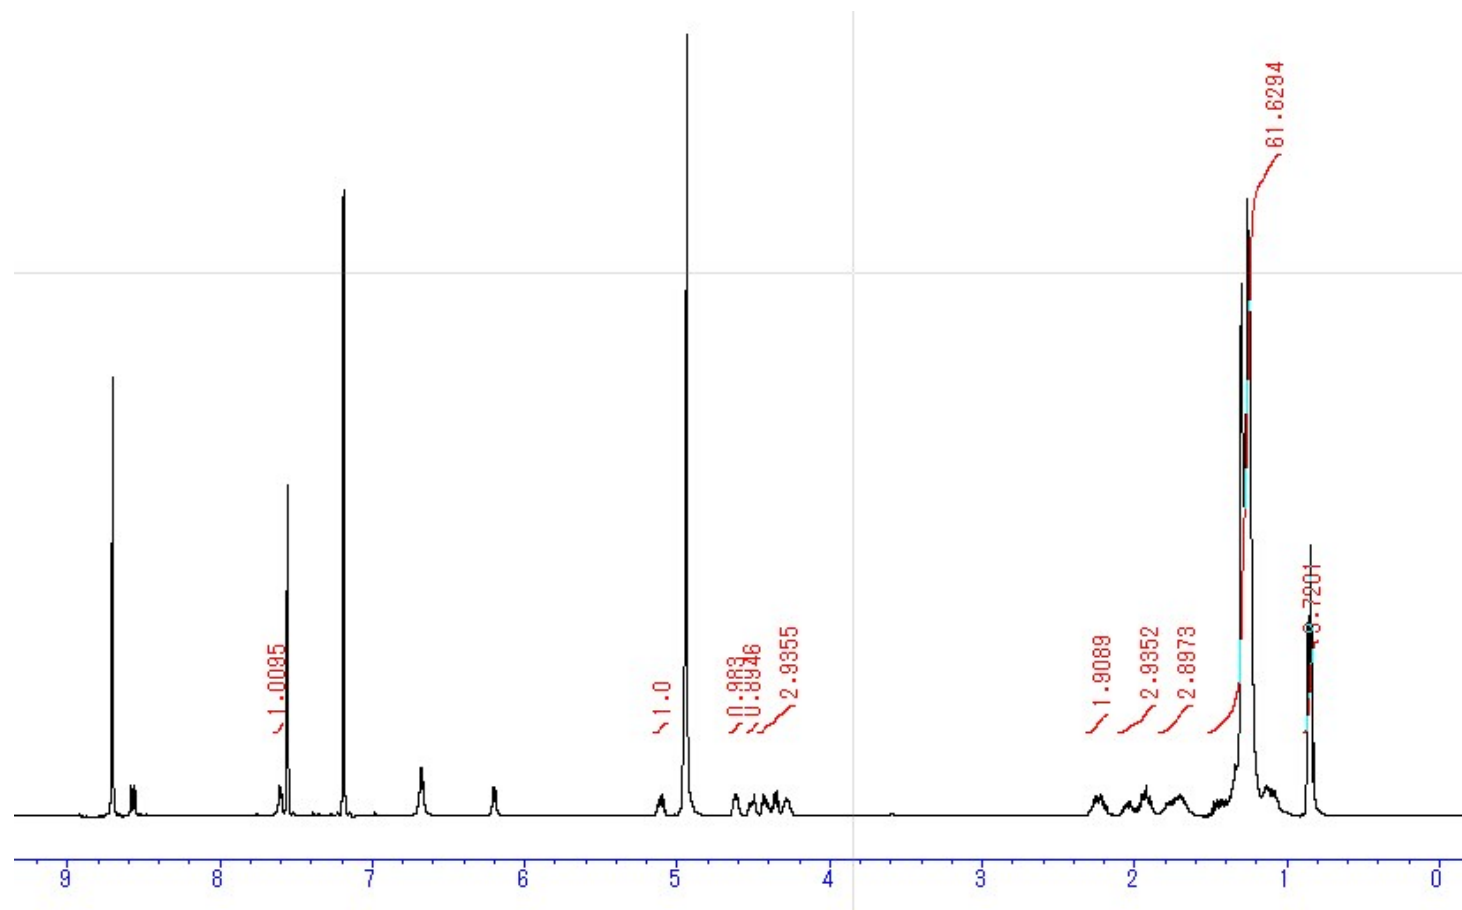

**Figure S1:** <sup>1</sup>H-NMR spectrum of MEC-1 (400 MHz, C<sub>5</sub>D<sub>5</sub>N)

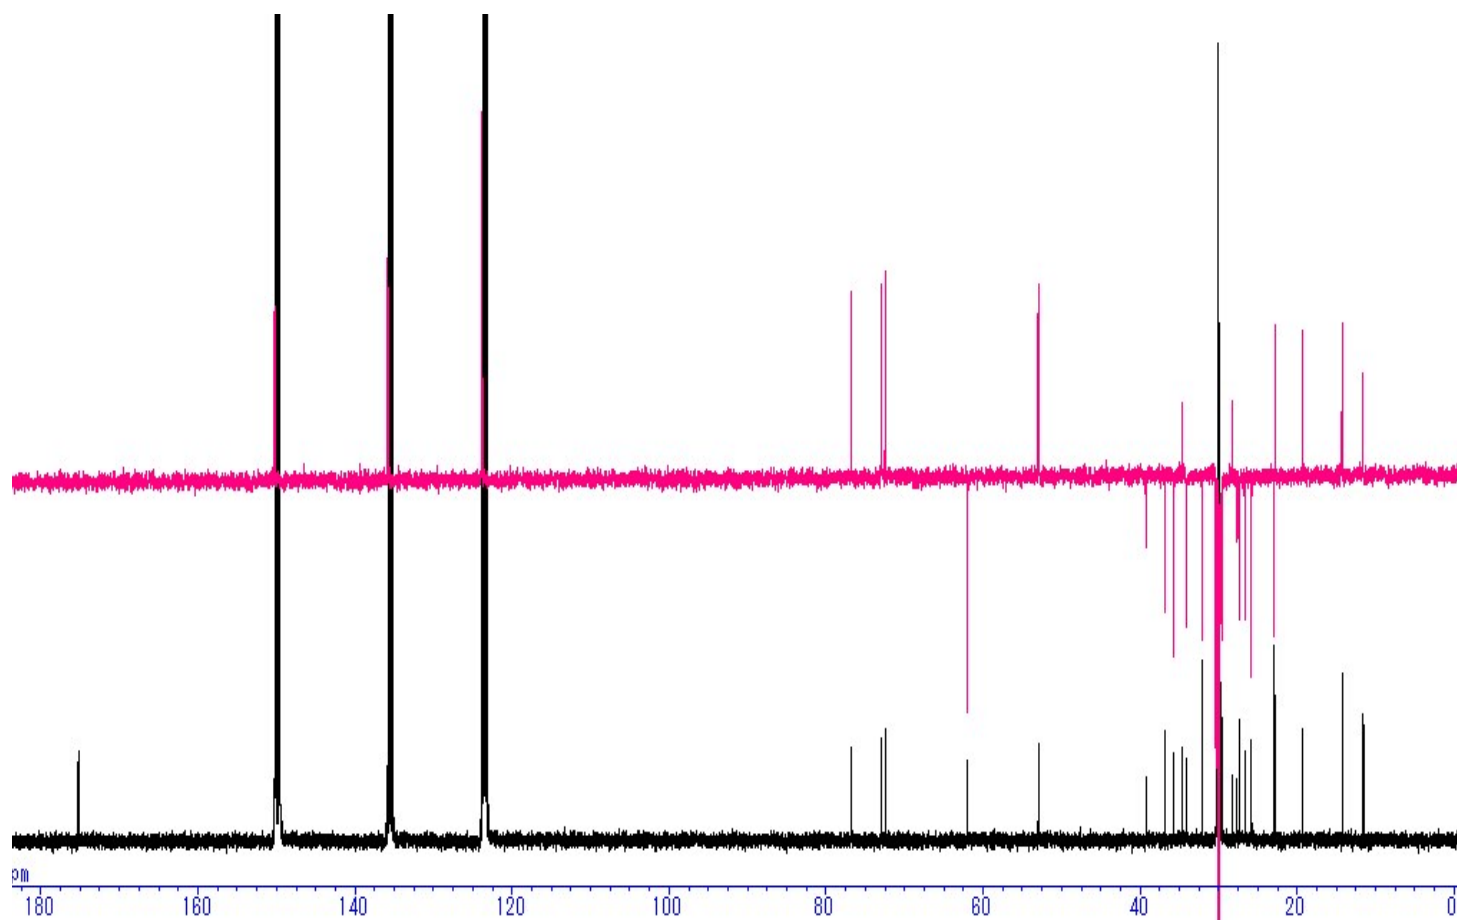

**Figure S2:**  $^{13}\text{C}$ -NMR spectrum of MEC-1 (400 MHz,  $\text{C}_5\text{D}_5\text{N}$ )

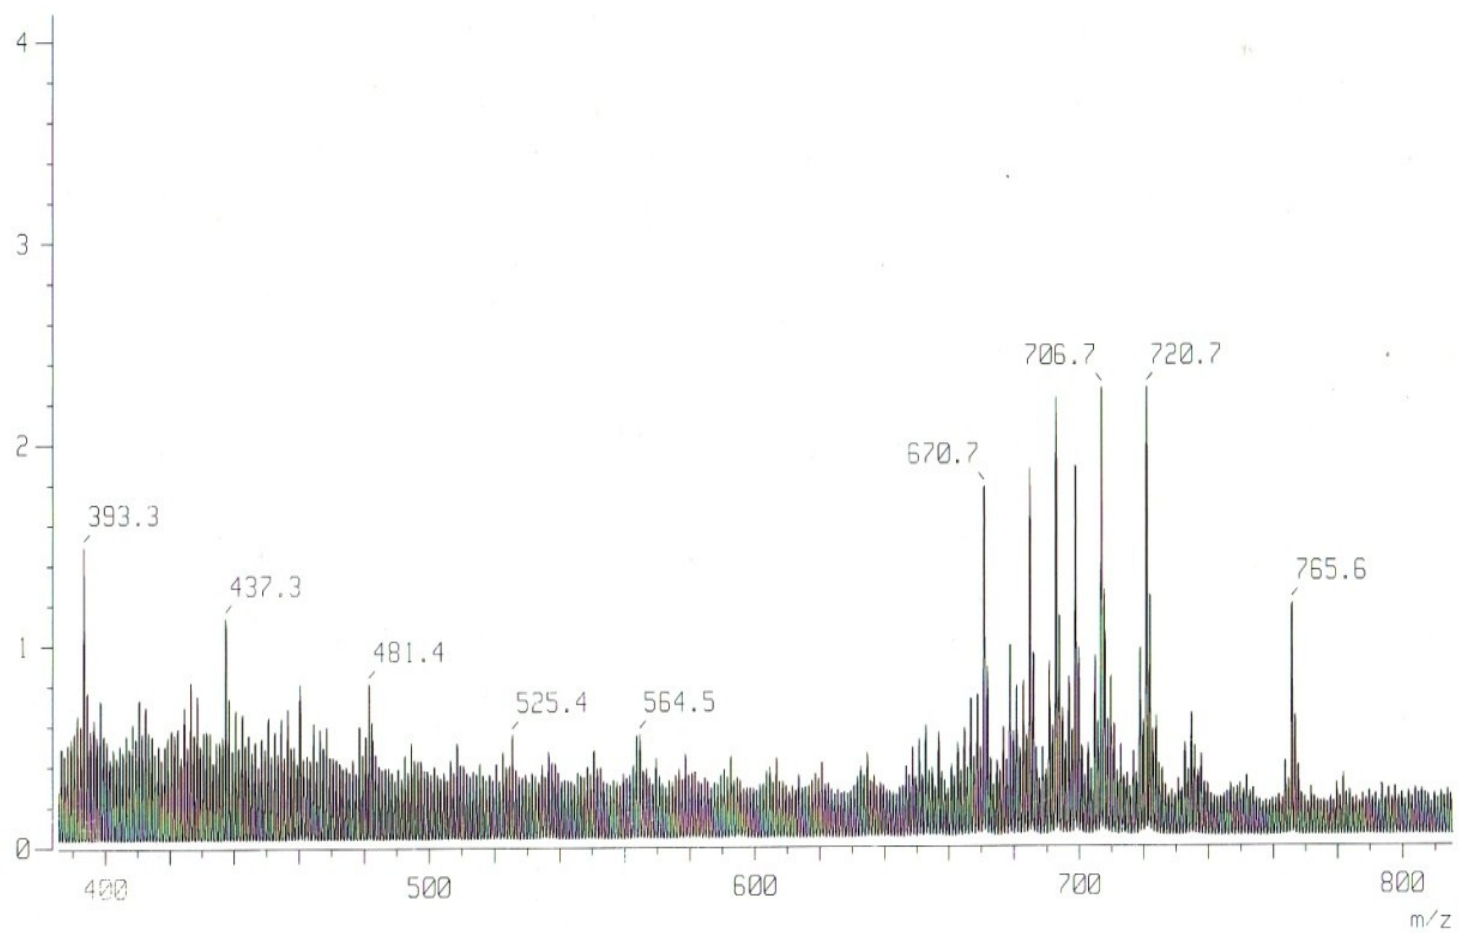

**Figure S3:** FAB-MS (positive ion mode) of MEC-1

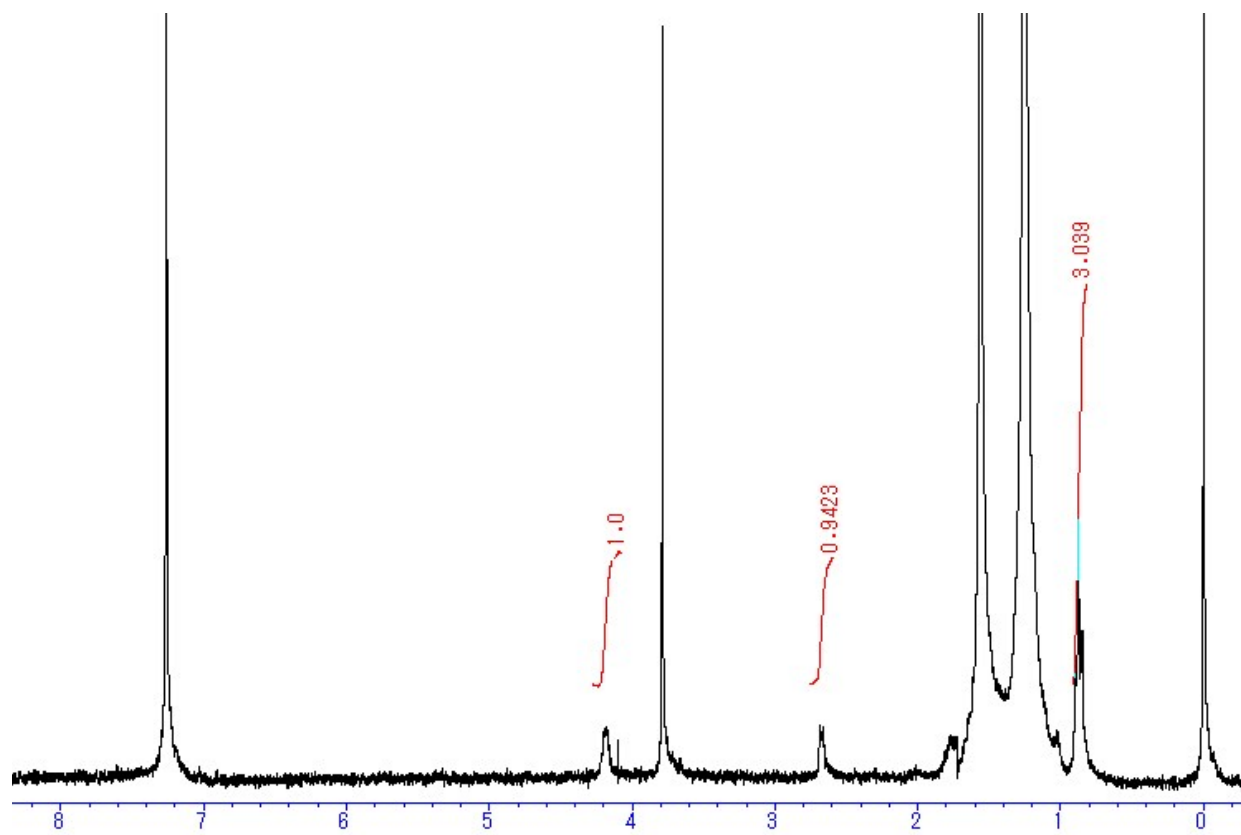

**Figure S4:** <sup>1</sup>H-NMR spectrum of FAMES after hydrolysis of MEC-1 (400 MHz, CDCl<sub>3</sub>)

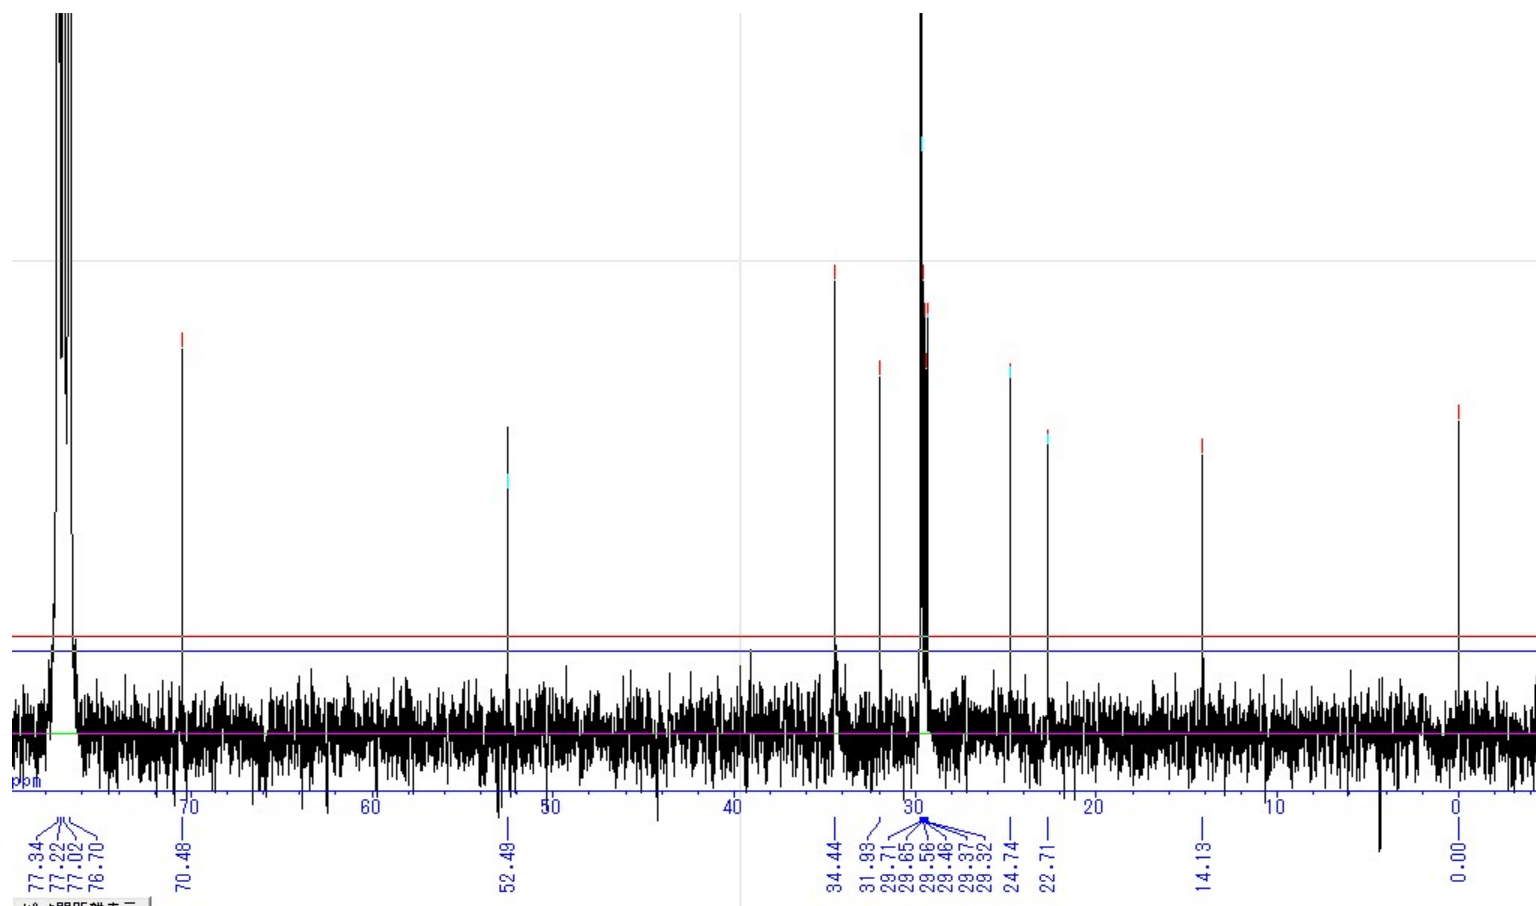

**Figure S5:**  $^{13}\text{C}$ -NMR spectrum of FAMES after hydrolysis of MEC-1 (400 MHz,  $\text{CDCl}_3$ )

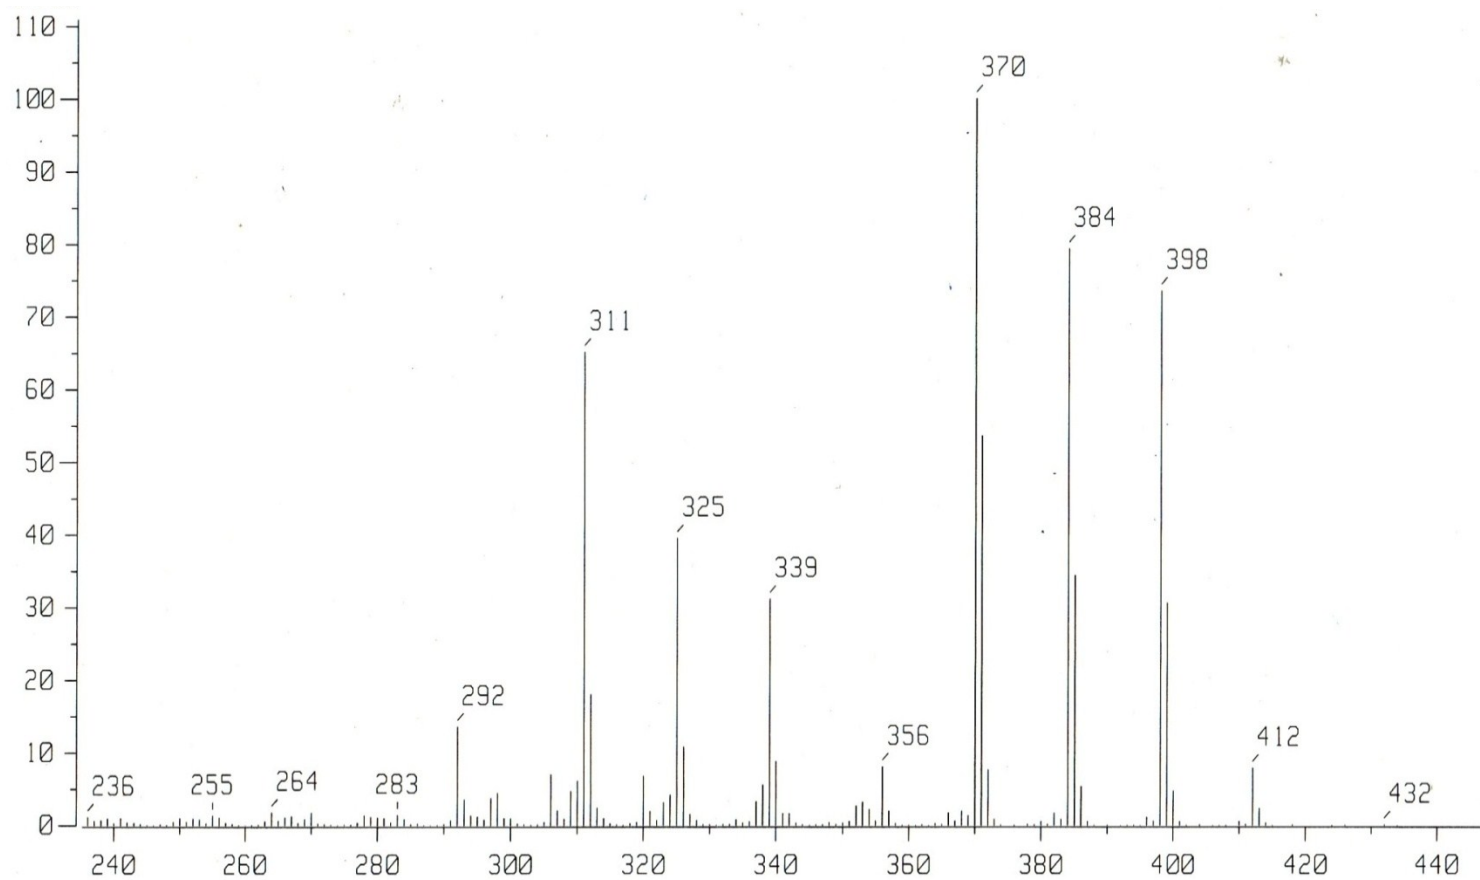

**Figure S6:** EI-MS of FAMES after hydrolysis of MEC-1



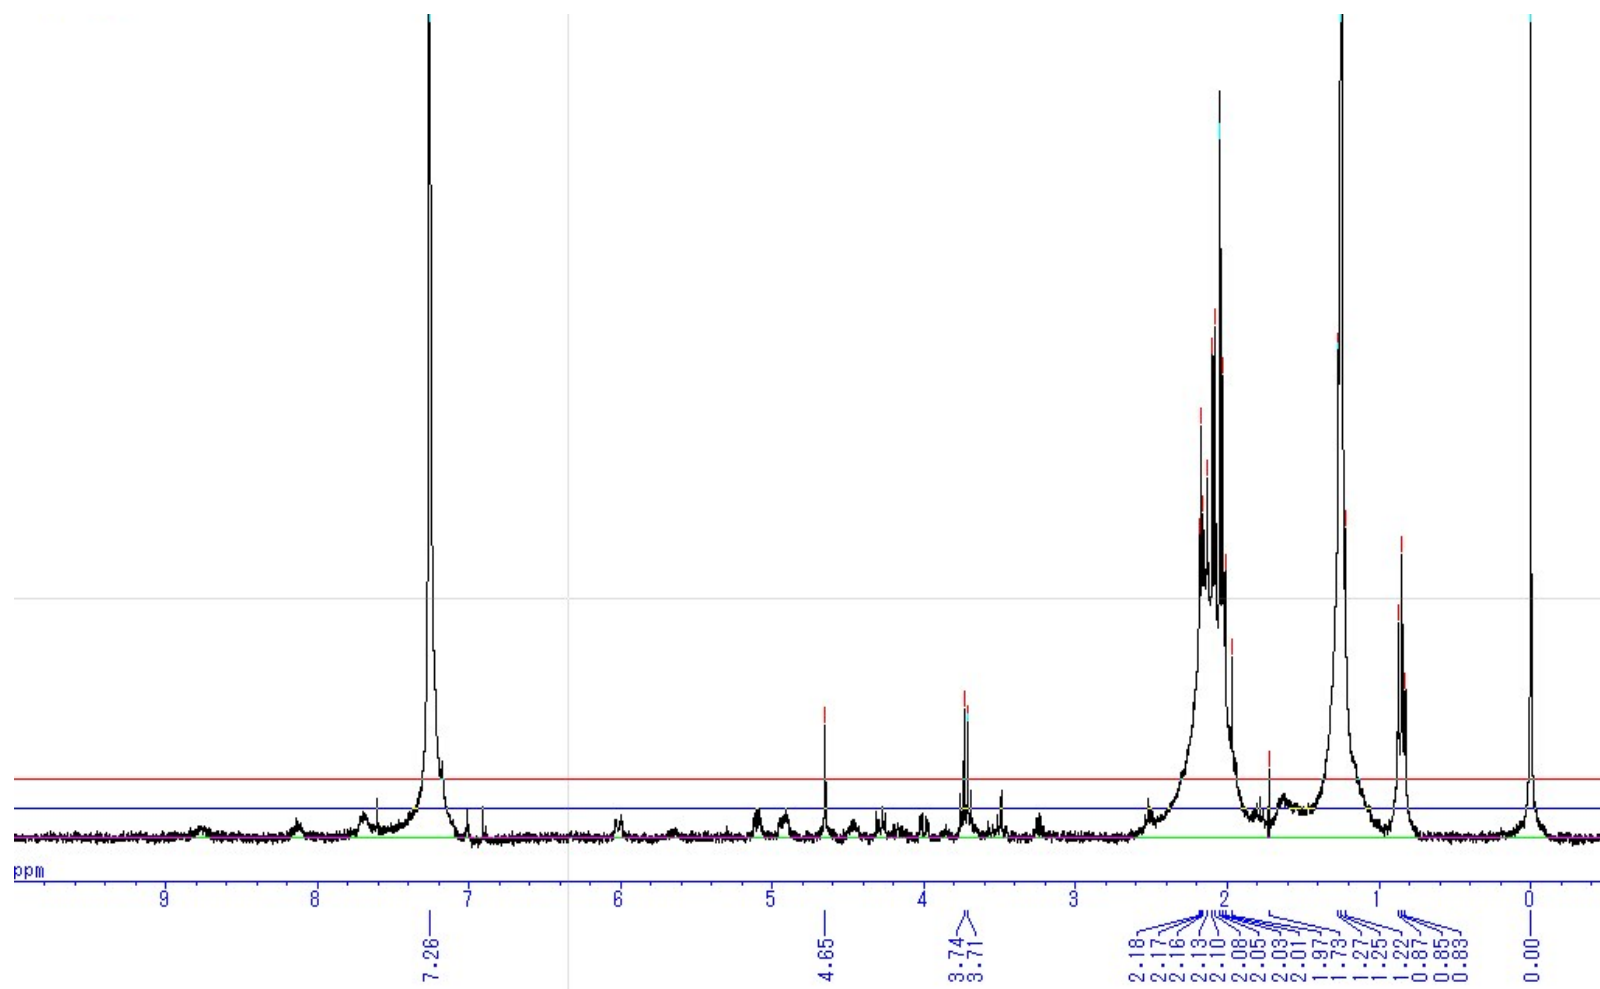

**Figure S7:**  $^1\text{H}$ -NMR spectrum of LCB after hydrolysis of MEC-1 (400 MHz, MeOD)

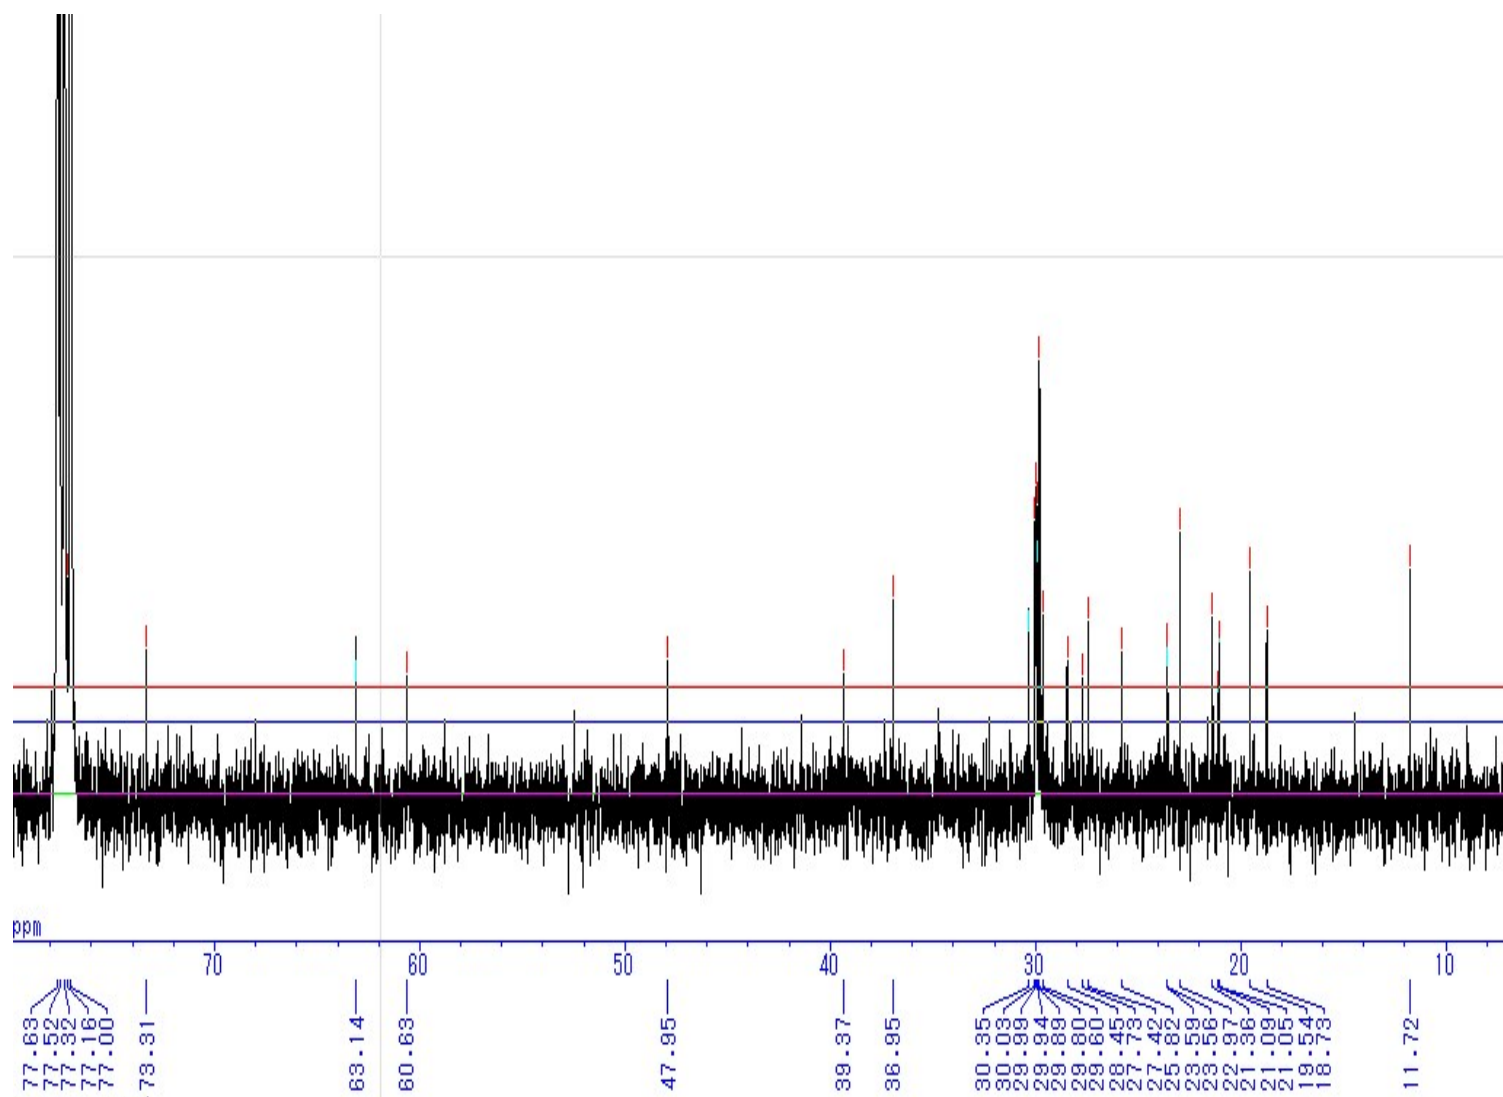

**Figure S8:**  $^{13}\text{C}$ -NMR spectrum of LCB after hydrolysis of MEC-1 (400 MHz, MeOD)

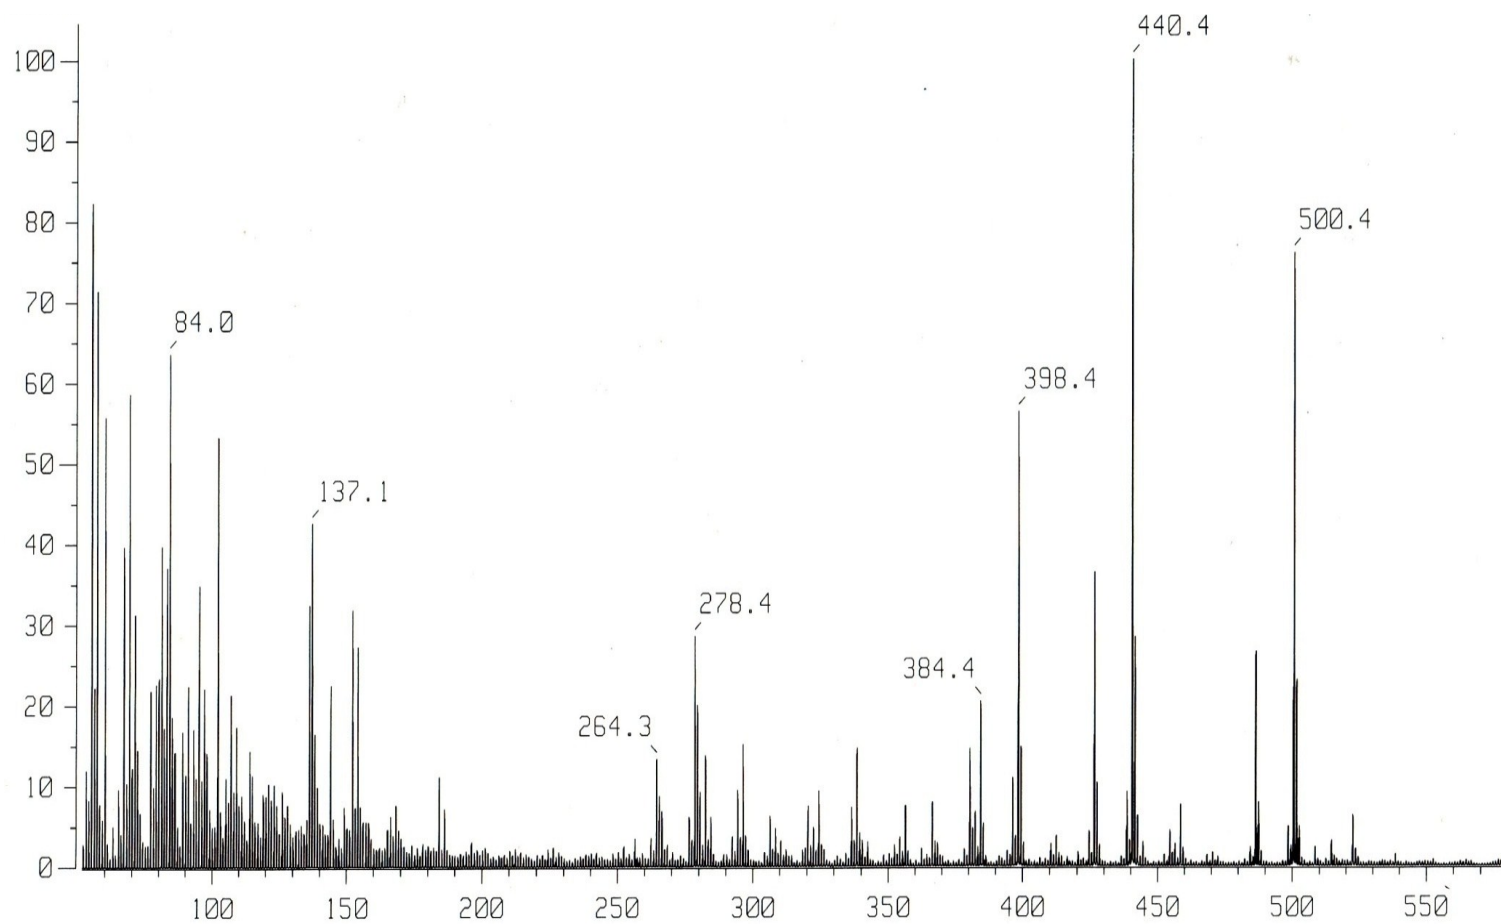

**Figure S9:** FAB-MS (positive ion mode) of LCB after hydrolysis of MEC-1

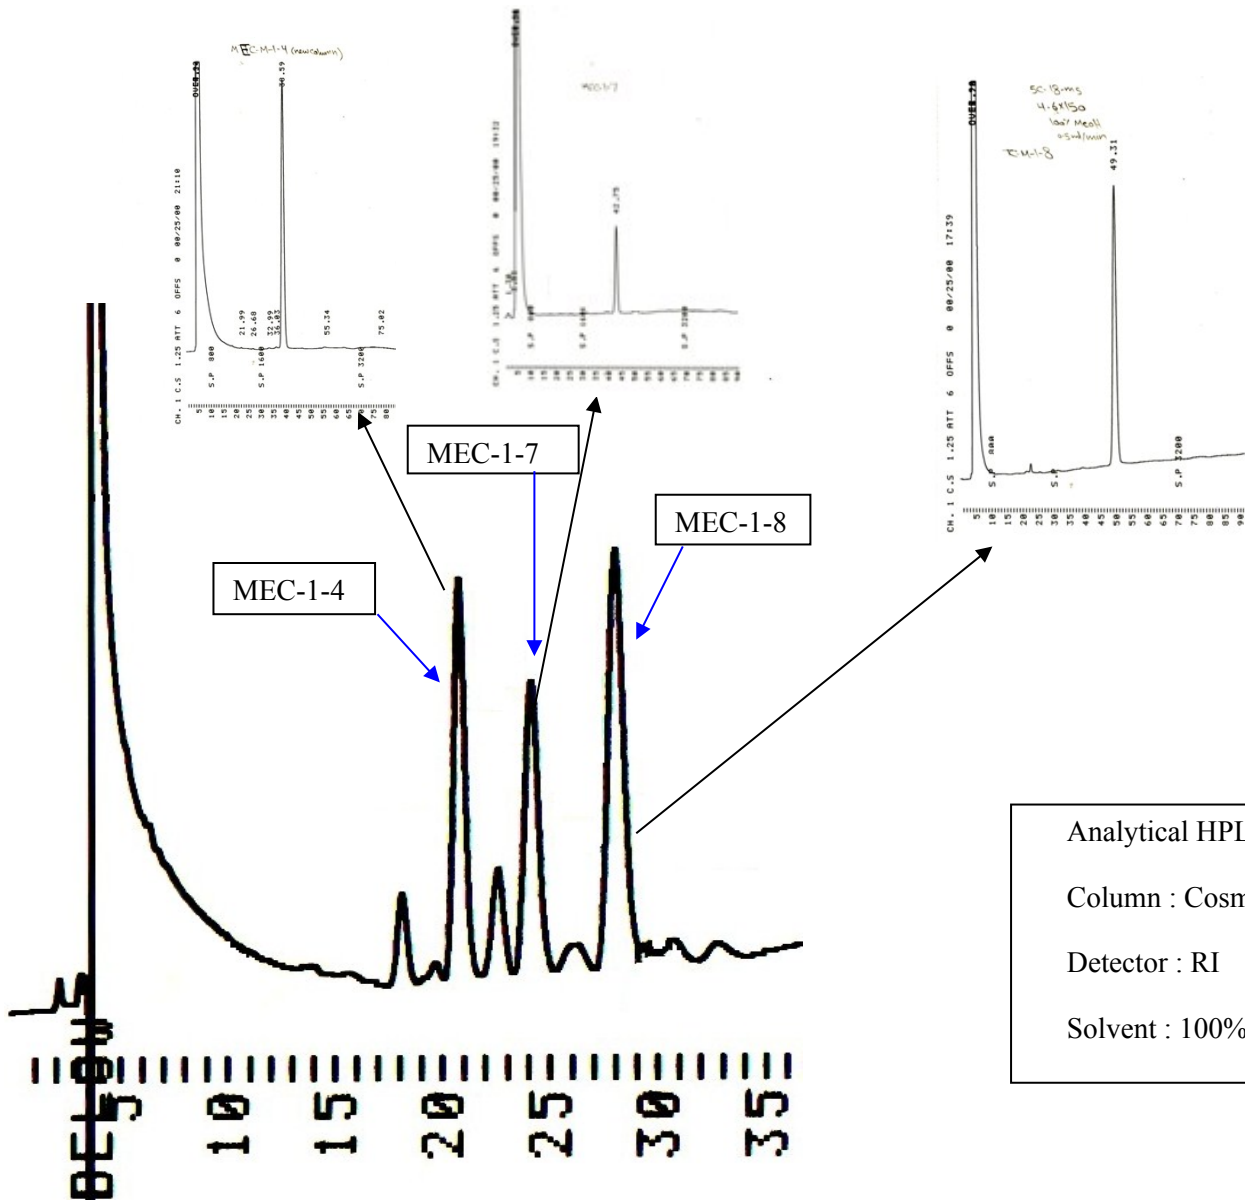

Analytical HPLC chromatogram of MEC-1  
 Column : Cosmosil 5C18-MS  
 Detector : RI  
 Solvent : 100% MeOH

Figure S10: Analytical HPLC chromatogram of MEC-1

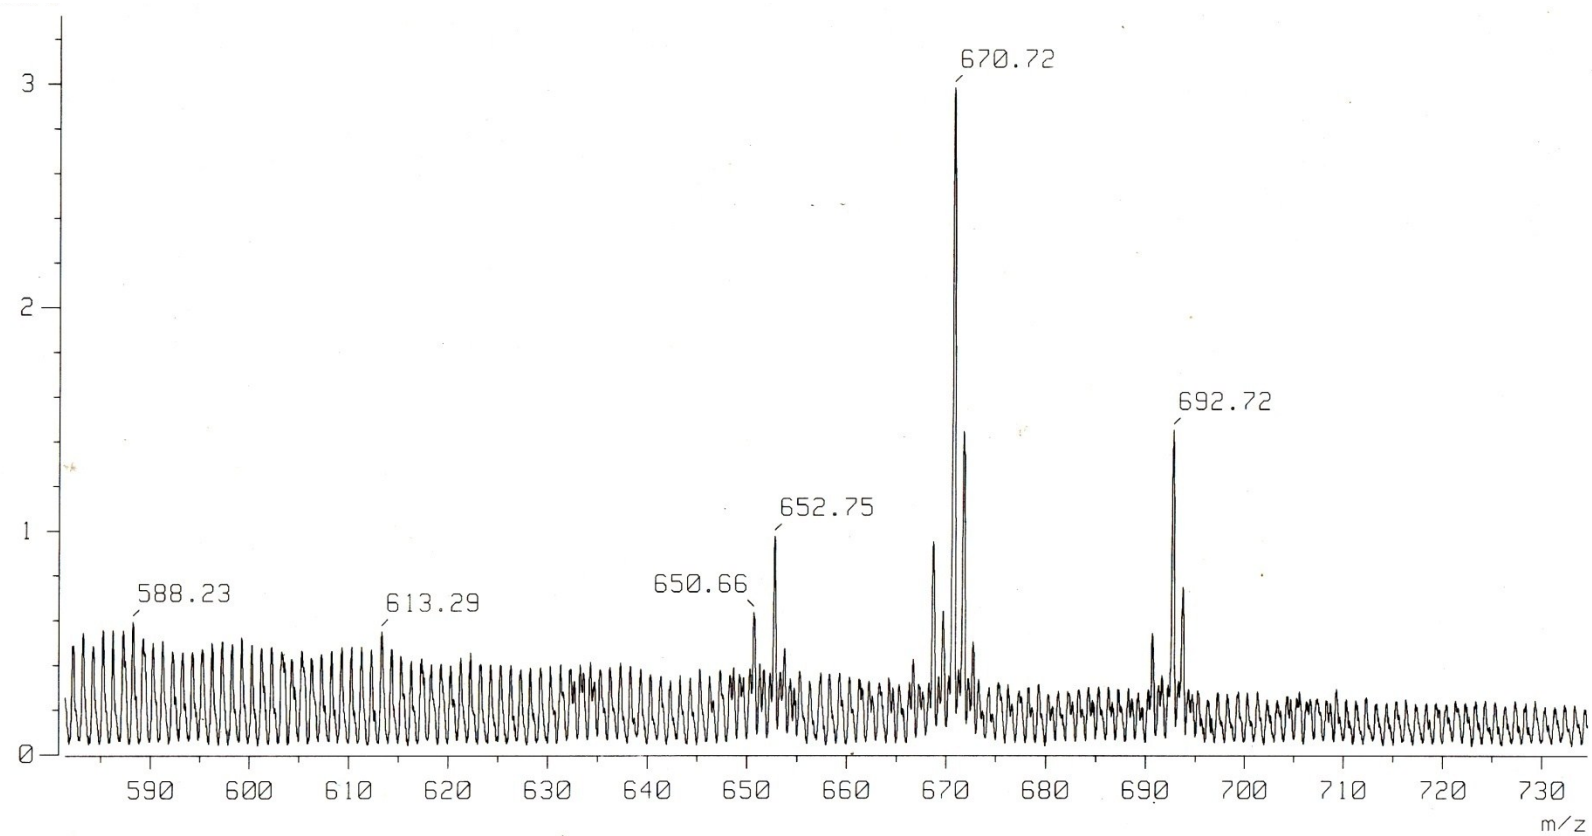

**Figure S11:** FAB-MS (positive ion mode) of MEC-1-4

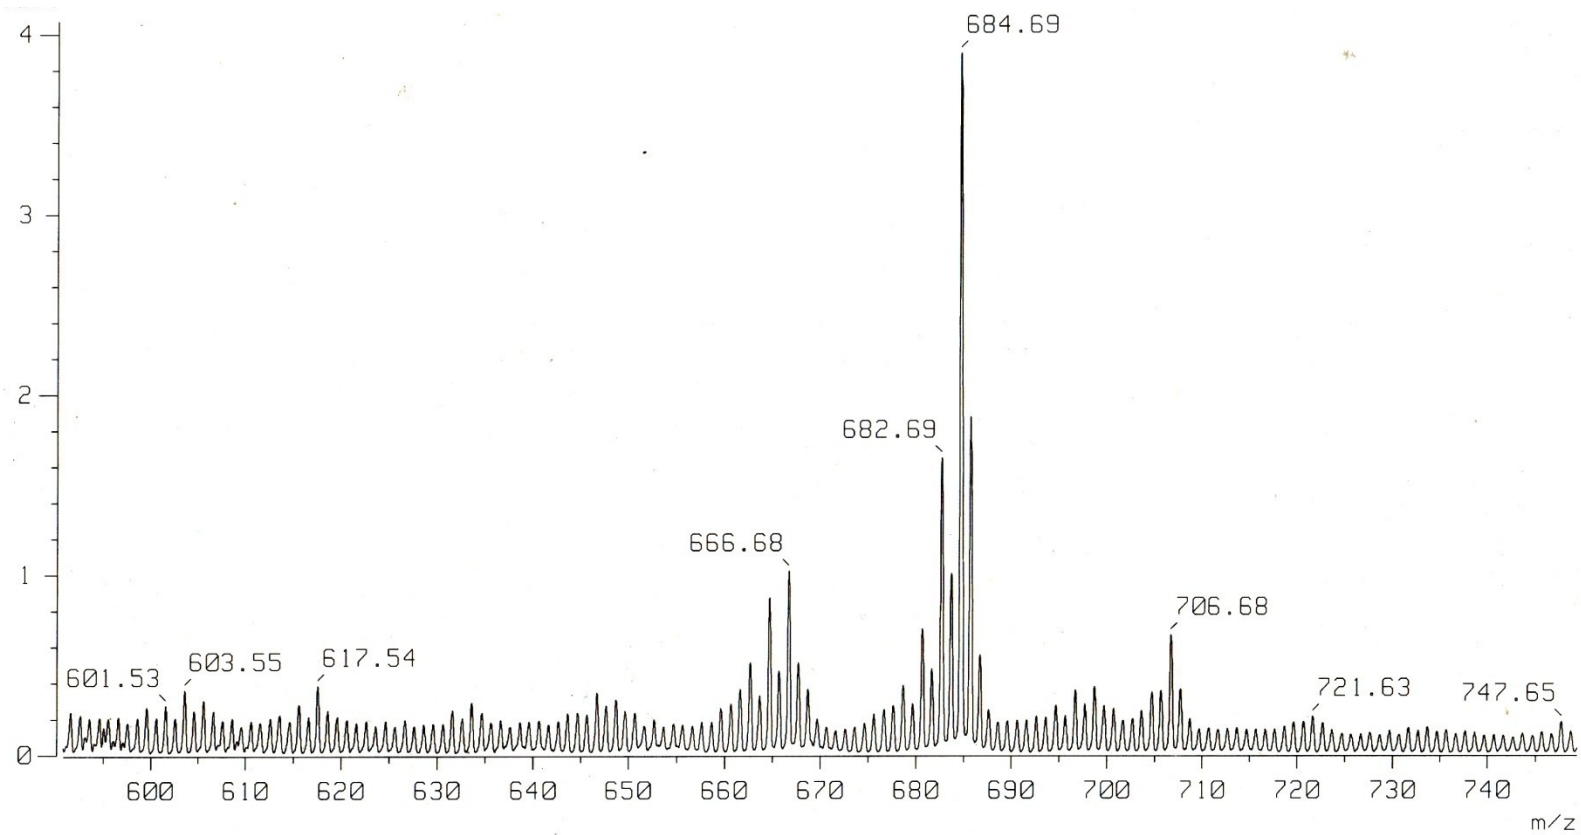

**Figure S12:** FAB-MS (positive ion mode) of MEC-1-7

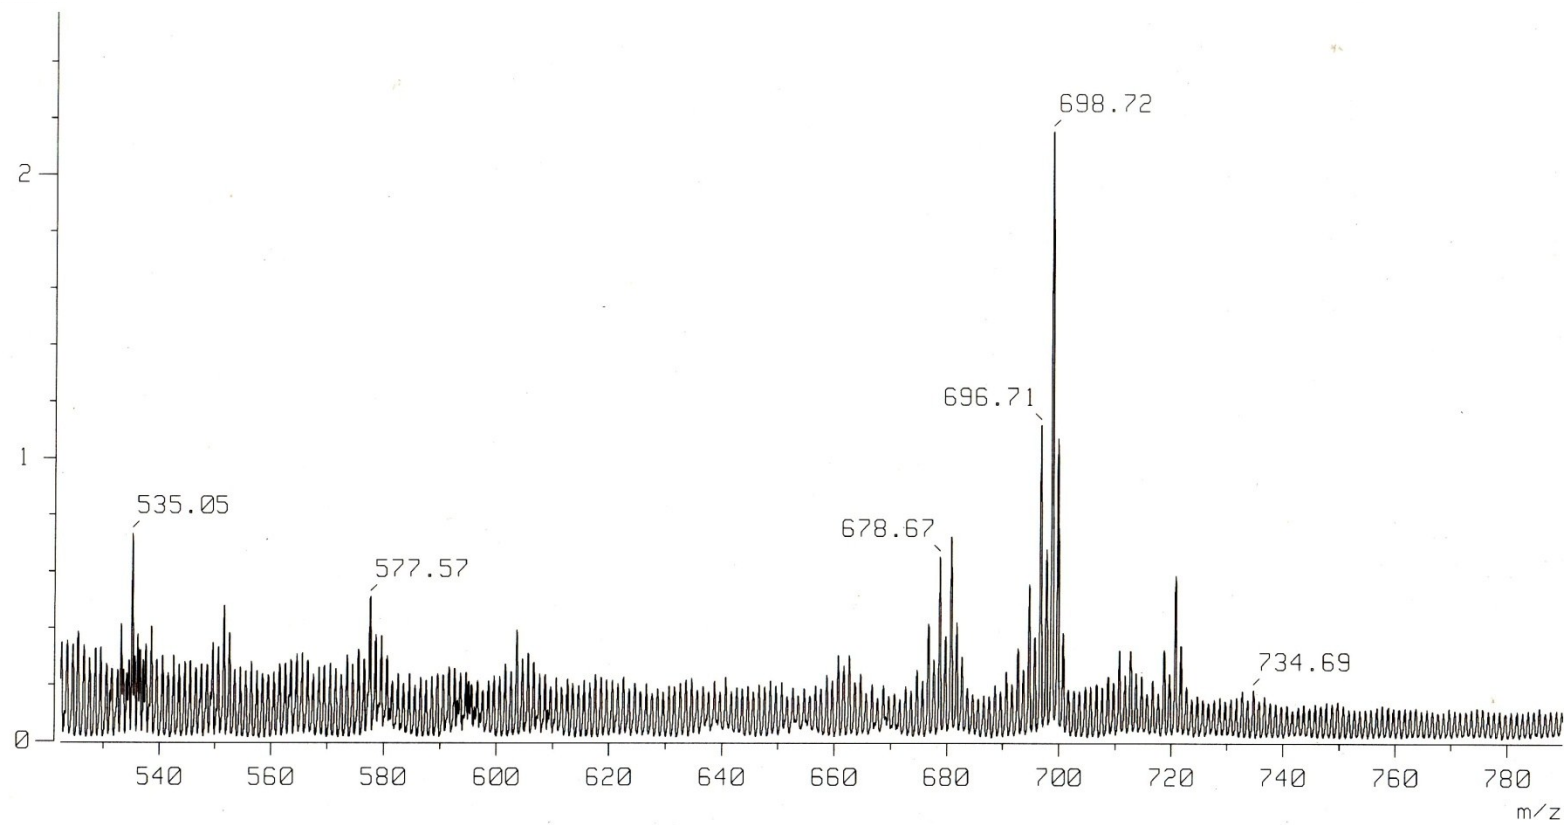

**Figure S13:** FAB-MS (positive ion mode) of MEC-1-8
